It is made available under a [CC-BY-NC-ND 4.0 International license](https://creativecommons.org/licenses/by-nc-nd/4.0/) .

1 **TITLE:** Butyrate-producing gut bacteria are associated with protection from allergic symptoms after  
2 Hurricane Harvey

3  
4 **Authors:** Kristen M. Panthagani,<sup>1,2,3</sup> Kristi L. Hoffman,<sup>4</sup> Abiodun Oluyomi,<sup>5</sup> Jesus Sotelo,<sup>5</sup> Christopher  
5 Stewart,<sup>4,6</sup> Georgina Armstrong,<sup>5,7</sup> Dan Na Luo,<sup>3</sup> Melissa Bondy,<sup>5,7</sup> Cheryl Lyn Walker,<sup>\*1,3,8</sup> and Joseph F.  
6 Petrosino<sup>\*4</sup>

7  
8 **Affiliations**

- 9 1. Genetics and Genomics, Baylor College of Medicine, Houston, TX, USA
  - 10 2. Medical Scientist Training Program, Baylor College of Medicine, Houston, TX, USA
  - 11 3. Center for Precision Environmental Health, Baylor College of Medicine, Houston, TX, USA
  - 12 4. Alkek Center for Metagenomics and Microbiome Research, Department of Molecular Virology and  
13 Microbiology, Baylor College of Medicine, Houston, TX, USA
  - 14 5. Department of Medicine, Section of Epidemiology and Population Sciences, Baylor College of Medicine,  
15 Houston, TX, USA
  - 16 6. Clinical and Translational Research Institute, Newcastle University, UK
  - 17 7. Department of Epidemiology and Population Health, Stanford Cancer Institute, Stanford University,  
18 Stanford, CA
  - 19 8. Molecular and Cellular Biology, Baylor College of Medicine, Houston, TX, USA
- 20 \*Corresponding authors

21  
22 **Abstract**

23 Hurricane Harvey caused record-breaking, catastrophic flooding across the city of Houston. After  
24 floodwaters receded, several health concerns arose, including the potential adverse impact of exposure to  
25 mold in flooded homes. We rapidly launched the Houston Hurricane Harvey Health Study to evaluate if  
26 microbiome sampling in the wake of a disaster could inform flood-associated environmental exposures and  
27 adverse health outcomes. We enrolled a total of 347 subjects at 1-month and 12-months post-Harvey,  
28 collecting human (stool, nasal, saliva) and environmental (house swab) samples to profile the bacterial and  
29 fungal microbiota. Here we show reported exposure to mold was associated with increased risk of allergic  
30 symptoms for up to one year post-disaster, and that butyrate-producing bacteria in the gut were linked to  
31 protection from allergic symptoms in mold-exposed individuals. Together, these data provide new insights  
32 into how microbiome:environment interactions may influence health in the setting of a flood-related disaster.

### 33 **Introduction**

34 On August 25, 2017, Hurricane Harvey made landfall in Rockport, Texas as a category 4 hurricane, marking  
35 the beginning of the second costliest tropical cyclone disaster in US history.<sup>1</sup> Over the next several days,  
36 the slow-moving storm system stalled over Harris County, dropping over 50 inches of rain, breaking the  
37 record for continental US rainfall.<sup>2</sup> Catastrophic flooding across the greater Houston area impacted over  
38 200,000 homes in Harris County alone.<sup>3</sup> Clean-up efforts lasted months, with many individuals “mucking  
39 and gutting” their own homes. Given the unprecedented levels of flooding, extensive clean-up efforts, and  
40 the humid climate in Southeast Texas, exposure to mold and other environmental microbes was a  
41 significant health concern.<sup>4</sup>

42  
43 Mold can cause a variety of health problems, including sequelae of mycotoxin ingestion and invasive  
44 infections in immunocompromised individuals.<sup>5</sup> However, for healthy individuals in non-occupational  
45 settings, the primary concern is allergic response and/or respiratory tract irritation caused by inhaled mold  
46 spores.<sup>5,6</sup> Mold growth and/or indoor dampness are associated with a variety of allergic pathologies  
47 including allergic rhinitis, eczema, and asthma exacerbation.<sup>7</sup> As many Houstonians remained in flood-  
48 damaged homes, the health effects of mold exposure became a significant concern.<sup>8</sup> Previous studies on  
49 the health impact of mold growth caused by hurricanes have been inconclusive: after Hurricanes Katrina  
50 and Rita, 46% of homes assessed in New Orleans had documented mold growth, but no increase in  
51 symptoms related to mold exposure was detected.<sup>6</sup> However, these studies were limited to individuals who  
52 sought medical care and likely overlooked those who chose not to seek treatment or lacked access to  
53 healthcare.<sup>6</sup> Thus, the health impact of mold exposure after flooding events remains unknown, particularly in  
54 communities with limited resources.

55  
56 The role of the microbiome in regulating allergic immune responses is becoming increasingly apparent.<sup>9</sup>  
57 Microbial-derived metabolites such as butyrate, a short-chain fatty acid (SCFA) derived from bacterial  
58 fermentation of dietary fiber, have been shown to directly regulate eosinophil migration and survival and

59 reduce allergic airway inflammation.<sup>10,11</sup> Given these findings, we hypothesized that human microbiome  
60 composition may be associated with health outcomes following exposure to environmental allergens such  
61 as mold.

62

63 We launched the Houston Hurricane Harvey Health (Houston3H) Study to assess environmental exposures  
64 and health outcomes of Houstonians impacted by Hurricane Harvey. We found mold exposure was  
65 significantly associated with increased risk of at least one allergic symptom up to a year after Hurricane  
66 Harvey. Furthermore, we discovered that subjects with higher levels of butyrate-producing gut bacteria were  
67 at lower risk for allergic symptoms even with mold exposure. Therefore, while exposure to mold in the  
68 setting of a flood-related disaster can increase risk of allergic symptoms, the gut microbiome may play an  
69 important role in mitigating this risk.

70

## 71 **Results**

### 72 **Cohort Characteristics**

73 The Houston3H Study enrolled a total of 347 subjects from 270 households across two timepoints: 206  
74 subjects (178 households) at 1-month post-Harvey and 266 subjects (199 households) at 12-months post-  
75 Harvey, which includes 125 subjects (107 households) who participated at both time points. Subjects were  
76 recruited from four distinct Houston-area neighborhoods impacted by Hurricane Harvey: Addicks, Baytown,  
77 East Houston, and Bellaire/Meyerland. Demographics varied significantly by neighborhood: the majority of  
78 subjects from Addicks and Bellaire/Meyerland were Non-Hispanic White and lived in census tracts with  
79 lower Area Deprivation Index (ADI) scores, indicative of higher socioeconomic status, while the majority of  
80 subjects from Baytown and East Houston were Hispanic or Non-Hispanic Black and had higher ADI scores  
81 (**Figure 1a, Supplementary Table 1**). Details of this cohort have been previously described.<sup>12</sup>

82

### 83 **Human and house microbiome composition varies by demographics and geography**

84 We first evaluated the microbiome composition in association with subject demographics and geography.  
85 We profiled the bacterial microbiome using 16S-V4 rRNA amplicon sequencing, and beta diversity (Binary  
86 Jaccard) analyses revealed strong associations between race/ethnicity, age, neighborhood, enrollment site,  
87 and ADI and the human microbiome (**Figure 1b, Supplementary Figure 1**). The stool and salivary  
88 microbiomes were more strongly associated with race/ethnicity than any other demographic variable tested,  
89 suggesting that race and ethnicity and/or associated collinear cultural and dietary factors are major drivers  
90 of microbial ecology in these body sites. In contrast, the nasal microbiome was most strongly associated  
91 with neighborhood, suggesting that geographic location plays a significant role in shaping the nasal  
92 microbiome.

93  
94 Using Internal Transcribed Spacer-2 (ITS2) amplicon sequencing, we profiled the fungal microbiome  
95 (mycobiome) of nasal, stool and house swab samples. Beta diversity analyses revealed the same variables  
96 that drove nasal bacterial microbiome composition impacted the nasal mycobiome, with neighborhood more  
97 strongly associated with mycobiome composition than race/ethnicity. However, unlike the stool bacterial  
98 microbiome, we found no association between the taxonomic composition of the stool mycobiome and any  
99 demographic variables tested. We additionally profiled a snapshot of the microbes in the home environment  
100 (house microbiome). Subjects sampled their homes by swabbing the entry/threshold of their home's front  
101 door. At 1-month post-Harvey (**Figure 1b**), beta diversity analyses revealed no association between the  
102 house microbiome (fungal and bacterial) and demographic variables. At 12-months post-Harvey, we found a  
103 significant association between geographical variables and the house microbiome (both fungal and  
104 bacterial), suggesting that geographical location (neighborhood) plays a significant role in shaping the  
105 community of microbes in the home environment (**Supplementary Figure 1**).

106

### 107 **Impact of mold exposure on allergic symptoms**

108 We next assessed the relationship between allergic symptoms and mold exposure. Our questionnaire was  
109 designed using the NIH Disaster Research Response Resources (<https://dr2.nlm.nih.gov>) and asked

110 subjects to report symptoms known to be associated with indoor dampness or mold exposure<sup>7,13</sup> including  
111 throat irritation, sinus irritation, eye irritation, wheezing, cough, shortness of breath, and skin rash (both time  
112 points) and worsening asthma (1-month post-Harvey only). For simplicity, we collectively refer to this group  
113 of mold-associated symptoms as “allergic symptoms.” For the seven individual symptoms included at both  
114 time points, our questionnaire asked subjects to report symptoms that occurred following the hurricane,  
115 excluding those resulting from a cold or seasonal allergies and inclusive of symptoms that had since  
116 resolved. The majority of participants reported at least one allergic symptom (70.4% in 1-month post-Harvey  
117 cohort, 65.0% in 12-months post-Harvey cohort), with minimal variation in subject demographics by allergic  
118 symptoms (**Supplementary Tables 2-3**). Building on our prior work assessing the relationship between  
119 hurricane exposures and individual allergic symptoms,<sup>12</sup> in the present study we analyzed symptoms  
120 collectively and assessed the relationship between reported mold exposure and the presence of at least  
121 one allergic symptom. At 1-month post-Harvey, both reported exposure to visible mold and new signs of  
122 mold in the home were associated with increased risk of at least one allergic symptom (**Figure 2**). In the 12-  
123 months post-Harvey cohort, when the majority of flood remediation was complete, only signs of mold growth  
124 in the home was associated with increased risk of allergic symptoms (**Figure 2**).

125

### 126 **Gut bacterial microbiome is associated with allergic symptoms when mold is present in the home**

127 As the microbiome has a major influence on systemic immune responses to allergens,<sup>14</sup> we asked if there  
128 was an association between reported allergic symptoms and the microbiome. Using 16S-V4 and ITS2  
129 amplicon sequencing, we discovered a strong association between the gut bacterial microbiome and  
130 allergic symptoms at 1-month post-Harvey, but no association in any other sample type (**Figure 3a**). We  
131 performed Whole Genome Shotgun (WGS) sequencing to verify this association using species-level  
132 resolution of the gut microbiome, and again found significant clustering of taxonomic composition by  
133 presence of allergic symptoms (**Figure 3b**). This association did not persist at 12-months post-Harvey in the  
134 gut or any other sample type (**Supplementary Figure 2**). Among individuals who reported new signs of  
135 mold in their home after Harvey, we found that gut microbiome composition at 12-months post-Harvey was

136 associated with allergic symptoms, potentially due to the ongoing allergen exposure even after remediation  
137 efforts (**Figure 3b**). No significant differences in gut microbiome alpha diversity (species richness) by  
138 allergic symptoms were detected (**Figure 3c**).

139

### 140 **Butyrate-producing bacteria are enriched in the gut microbiome of subjects without allergic** 141 **symptoms**

142 We next determined which bacterial species were driving the observed gut microbiome:environmental mold  
143 interaction with allergic health outcomes. Linear Discriminant Analysis Effect Size<sup>15</sup> (LEfSe) revealed that  
144 species enriched in subjects without allergic symptoms had the common ability to produce butyrate, a  
145 microbial product known to regulate immune cells and mitigate allergic responses<sup>11,16</sup> (**Figure 4a,b**). At 1-  
146 month post-Harvey, multiple butyrate-producing species were enriched in subjects without allergic  
147 symptoms, including *Roseburia intestinalis*, *Roseburia inulinovorans*, *Bacteroides finegoldii*, *Coprococcus*  
148 *comes*, and *Eubacterium ventriosum*. At 12-months post-Harvey, only a single butyrate-producing bacterial  
149 species (*Bacteroides faecis*) was enriched in subjects without allergic symptoms. However, co-occurrence  
150 analysis revealed that *B. faecis* frequently co-occurred with other butyrate-producing bacteria including  
151 multiple *Alistipes*, *Bacteroides*, and *Roseburia* spp. (**Figure 4c,d**). This suggests that butyrate production  
152 may be driven by a cooperative network of multiple bacteria rather than dominance of only a few species  
153 driving butyrate production. Notably, *Ruminococcus gnavus*, which negatively co-occurs with many  
154 butyrate-producing bacteria, was enriched in subjects with allergic symptoms at 12-months post-Harvey.  
155 This pattern of *R. gnavus* negative co-occurrence was remarkably consistent across both time points as  
156 well as multiple independent cohorts from the US and Europe (**Supplementary Figure 3**).

157

### 158 **Microbial butyrate metabolism genes are enriched in the gut microbiome of subjects without allergic** 159 **symptoms**

160 We next examined the functional capacity of the gut microbiome using WGS sequencing data. We found  
161 that butyrate metabolism genes were significantly enriched in the guts of subjects without allergic symptoms

162 at 1-month post-Harvey (**Figure 5a**). At 12-months post-Harvey, similar to taxonomic composition (**Figure**  
163 **3b**), we found that while there was no difference in butyrate metabolic capacity by allergic symptoms across  
164 all subjects (**Figure 5b**), when including only subjects reporting signs of mold growth in their home post-  
165 Harvey, we saw a significant enrichment of butyrate metabolism genes in the gut microbiome of subjects  
166 without allergic symptoms (**Figure 5c**). To test if the consistency of this association was driven primarily by  
167 longitudinal subjects who participated at both time points, we next repeated this analysis excluding  
168 longitudinal subjects, and found that this association was reproducible in the cohort of subjects who  
169 participated at the 12-month post-Harvey time point only (**Supplementary Figure 4**). Given that many  
170 bacterial species capable of producing butyrate are also able to produce other short chain fatty acids  
171 (SCFA; e.g., propionate and acetate), we asked if gene content of the gut microbiome was enriched for  
172 these metabolic pathways, but found no difference between subjects with and without allergic symptoms at  
173 either time point (**Figure 5**). To test if additional bacterial functions could also be associated with allergic  
174 health outcomes, we performed LEfSe analysis on all mapped functional pathways (**Supplementary Figure**  
175 **5**), which revealed several other functional pathways associated with allergic health outcomes; notably, fatty  
176 acid biosynthesis was enriched in subjects without allergic symptoms at both 1-month and 12-months post-  
177 Harvey. Finally, we evaluated factors known to associate with gut microbiome composition including body  
178 mass index (BMI)<sup>17</sup> and recent antibiotic use,<sup>18</sup> and we found no association between these variables and  
179 butyrate metabolism gene abundance at either time point (**Supplementary Figure 6**).

### 180 181 **Impact of hurricane exposures on microbiome composition**

182 We next sought to determine if hurricane exposures may have altered human microbiome composition.  
183 Beta diversity analysis revealed no significant associations between hurricane exposures (exposure to dirty  
184 water, sewage, visible mold, new signs of mold growth in the home since Harvey, and whether subjects  
185 were rescued or involved in clean-up work) and human microbiome composition in any sample type  
186 (**Supplementary Figure 7**). We next evaluated if ITS2 amplicon sequencing of house threshold samples  
187 can be used to assess mold growth in the home, and discovered no significant association between house

188 threshold mycobiome profiles and subject reported mold growth. (**Supplementary Figure 7**). Given the  
189 variation in the mycobiome across neighborhoods, we hypothesized this lack of association may be  
190 explained by neighborhood-specific mold signatures, supposing a single signature indicative of mold growth  
191 may not be universal across Houston. At 12-months post-Harvey, we found that each subjects' nasal  
192 mycobiome was more similar (shorter Binary Jaccard distance) to the mycobiome of their own home relative  
193 to other homes, suggesting each home has its own unique mold exposure profile. However, the similarity  
194 (Binary Jaccard distance) between a subjects' nasal and house mycobiome was not associated with  
195 reported exposure to mold or signs of mold growth in the home (**Supplementary Figure 8**).

196

## 197 **Discussion**

198 By rapidly launching the Houston3H study following an unprecedented flooding disaster in our city, we were  
199 able to assemble a uniquely diverse cohort to evaluate the interaction between environmental exposures  
200 and microbiome composition in a disaster setting. We found significant associations between exposure to  
201 mold and allergic symptoms. At 1-month post-Harvey, both reported exposure to visible mold (anywhere)  
202 and reported signs of mold growth in the home were associated with increased risk of at least one allergic  
203 symptom, while at 12-months post-Harvey only signs of mold in the home was associated with increased  
204 risk of allergic symptoms. These data suggest that at 1-month post-Harvey, mold in the home was not  
205 necessarily the primary source of mold exposure, while months after the Hurricane, mold growth in the  
206 home likely became the primary source.

207

208 Our study provides epidemiological corroboration of prior observational and mechanistic work establishing a  
209 strong link between butyrate and protection against allergic inflammation. Butyrate, a SCFA derived from  
210 fermentation of dietary fiber by gut microbiota,<sup>10</sup> is a key microbial product linking the microbiome and the  
211 immune system via regulation of inflammatory cytokine production and induction of regulatory T cells.<sup>16</sup>  
212 Multiple studies have found higher levels of butyrate-producing bacteria and/or fecal levels of SCFAs to be  
213 associated with protection against allergic health outcomes including asthma, allergic rhinitis, atopic



214 dermatitis, and allergic sensitization.<sup>19–22</sup> Several interventional studies in animal models have established a  
215 causal link between dietary fiber intake, butyrate, and protection against allergic airway disease including  
216 asthma.<sup>11,20,23,24</sup> Butyrate directly inhibits eosinophil migration, adhesion, and survival *in vitro*, and studies in  
217 adults with stable asthma have shown that consumption of fiber (with or without probiotics) acutely  
218 decreases airway inflammation and improves asthma control.<sup>11,25,26</sup> Together, these observations provide  
219 strong evidence that butyrate derived from bacterial fermentation of dietary fiber plays a significant role in  
220 attenuating allergic immune responses.

221

222 In our study, the association between lower levels of bacterial butyrate metabolism genes and presence of  
223 allergic symptoms was found at 1-month post-Harvey in all subjects, while at 12-months post-Harvey, this  
224 association was only detected in subjects who reported new signs of mold growth in their home after the  
225 hurricane. This pattern suggests a possible microbiome:environment interaction, whereby lack of butyrate  
226 producers in the gut may prime individuals for an allergic response, but individuals will only become  
227 symptomatic with antigen exposure. A sub-analysis excluding longitudinal subjects verified this association  
228 is reproducible in two distinct cohorts of participants.

229

230 Given that the gut microbiome represents a cooperative network of microbes rather than individual species  
231 exerting functional effects in isolation, it is possible that a gut microbial ecosystem marked by elevated  
232 levels of butyrate producers may harbor additional beneficial functionalities that influence allergic health  
233 outcomes. For example, *Candida albicans*, a yeast commonly found in the gut microbiome, has been shown  
234 to promote cross-reactive Th17 cells which trigger an allergic response upon mold exposure,<sup>27</sup> and  
235 *Roseburia* spp., which are butyrate-producers, have been shown to inhibit *C. albicans* growth.<sup>28</sup> Thus a gut  
236 microbiome with higher levels of *Roseburia* may protect against allergic pathology by both producing higher  
237 levels of butyrate and by preventing growth of *C. albicans* in the gut. Conversely, the mucin-degrader<sup>29</sup>  
238 *Ruminococcus gnavus* has been shown to precede onset of respiratory allergies and atopic eczema in

239 infants, and *R. gnavus* directly induced a Th2 allergic response and airway hyper-responsiveness in mice.<sup>30</sup>  
240 *R. gnavus* was found to negatively co-occur with many butyrate-producers in multiple independent cohorts.  
241 This may be explained by dietary fiber intake, as high dietary fiber promotes the growth of butyrate-  
242 producers,<sup>31</sup> while low dietary fiber promotes the growth of mucin-degraders like *R. gnavus*.<sup>32</sup> Thus,  
243 individuals who consume low fiber diets may have a gut microbiome marked by both lower levels of butyrate  
244 producers and higher levels *R. gnavus*, potentially predisposing them to allergic pathology via two  
245 synergistic mechanisms: lack of butyrate and *R. gnavus*-driven allergic inflammation. Together, this  
246 suggests that microbiome:environment interactions may be driven by synergistic effects of gut microbial  
247 ecology, including the presence of beneficial bacteria such as butyrate producers and absence of microbes  
248 that promote allergic pathology such as *C. albicans* and *R. gnavus*.

249

250 Our cohort was unique in its inclusion of study participants from four distinct neighborhoods in the Houston  
251 area, one of the most racially and ethnically diverse metropolitan areas in the United States. While the  
252 association between race/ethnicity and the human microbiome is well-established,<sup>33</sup> we discovered that  
253 neighborhood-level geographical associations, including indices of neighborhood-level poverty, are also  
254 strongly associated with microbiome composition. While this undoubtedly is partly driven by strong  
255 associations between race, ethnicity, neighborhood, and poverty, it reveals these factors should be  
256 considered when interpreting reported differences in microbiome composition by racial and ethnic variation.  
257 This is particularly apparent when considering the nasal microbiome, as the microbiota detected in the nose  
258 were more strongly associated with neighborhood than race/ethnicity. Gut mycobiome composition showed  
259 no significant associations with any demographic variable tested, consistent with previous reports that in  
260 contrast to the gut bacterial microbiome, which is relatively stable over time, the gut mycobiome is more  
261 dynamic.<sup>34</sup>

262

263 We did not find associations between hurricane exposures and microbiome composition, which may be  
264 explained by several factors. First, it is possible that the human microbiome is relatively resilient in the face

265 of disasters. Alternatively, it may be that Hurricane Harvey caused shifts in microbiome composition that  
266 were overpowered by the demographic variation in the microbiome; thus, a more racially and geographically  
267 homogenous cohort may have revealed differences not detected in our study. Third, it is possible that the  
268 impact of the hurricane on the microbiome is not uniform across individuals and that unique changes  
269 occurred in each individual which would not be captured by our methods. As culture-independent  
270 sequencing methods cannot profile absolute magnitude of microbes present, it is possible that the amount  
271 of microbes (such as mold) significantly varied by hurricane exposures, but were not detected due to this  
272 inherent limitation of our methodology.

273

274 While we were understandably unable to collect pre-hurricane samples for this study, the lack of association  
275 between hurricane exposures and microbiome composition suggests that the robust association between  
276 allergic symptoms and the gut microbiome detected in this cohort was likely not driven by hurricane-induced  
277 changes in gut microbiota. Rather, the level of butyrate-producing bacteria in each individual's gut  
278 microbiome may have been established prior to the hurricane, and the widespread mold exposure after the  
279 hurricane subsequently induced an immune response in susceptible individuals. Furthermore, by collecting  
280 self-reported symptoms known to be associated with mold exposure, we were able to capture health  
281 outcomes in populations who may have lacked access to health care or were unable to seek medical care  
282 for other reasons, a weakness of prior studies assessing health outcomes following flooding events.<sup>6</sup>  
283 However, our study was limited by the restraints inherent in rapidly launching a disaster microbiome study in  
284 response to a hurricane, as we were unable to further validate the etiology of symptoms included in our  
285 questionnaire.

286

287 The lack of association between mycobiome profiles and reported mold exposure suggests that mycobiome  
288 sequencing may not adequately capture clinically-significant mold exposures. For the house swabs  
289 collected at 1-month post-Harvey only, this may be explained by the use of non-sterile swabs to collect  
290 house threshold samples, which were utilized due to a shorthand of supplies immediately after the

291 hurricane, as sterile swabs were prioritized for human sampling. For all other samples types and time points  
292 (which utilized sterile collection materials), this lack of association may be explained by several possible  
293 factors: 1) the inability of ITS2 sequencing to quantify the magnitude of mold exposure, 2) fungal taxonomy  
294 analysis may not be sufficient to delineate the features of mold that trigger an allergic response, as many  
295 antigens contain cross-reactive epitopes that are shared among distantly-related fungal and non-fungal  
296 species,<sup>35</sup> 3) the nasal mycobiome may be relatively transient, thus exposures that occurred hours or days  
297 prior may not be accurately reflected at the time of nasal sampling. Finally, subjects were only able to swab  
298 a small portion of their homes, which assuredly did not capture the full profile of microbes present in the  
299 home environment.

300

301 Together, our data suggest that the human microbiome is shaped by long-term environmental factors such  
302 as neighborhood of residence, race/ethnicity, and socioeconomic status; in addition, it may be relatively  
303 resilient and stable in the face of acute, novel microbial exposures from flooding events. We found that  
304 exposure to mold is associated with increased risk of allergic symptoms after a severe flooding event.  
305 Furthermore, we found that the risk of these allergic symptoms may be dependent on the interaction  
306 between the microbiome and the environment, whereby lower levels of microbial butyrate production in the  
307 gut may prime individuals for an allergic response to mold, which then manifests upon mold exposure.

308

## 309 **Methods**

### 310 **Study Design and Recruitment**

311 The Hurricane Harvey Health (Houston3H) Study was launched by Baylor College of Medicine (BCM), The  
312 University of Texas Health Science Center (UTHealth), and Oregon State University (OSU) in response to  
313 the 2017 hurricane. Leveraging an existing disaster protocol at OSU, rapid IRB approval was obtained at  
314 BCM (Protocol H-42111) within days of reopening after the hurricane, and UTHealth obtained reciprocal  
315 approval. This study complied with all relevant ethical regulations. Enrollment took place September 23 –  
316 October 3, 2017 (referred to as 1-month post-Harvey), with follow-up one year later (August – December

317 2018; i.e., 12-months post-Harvey). Study eligibility criteria were (1) impacted by Hurricane Harvey through  
318 flooding and/or involvement in clean-up efforts, (2) age 5 or older, and (3) conversant in English or Spanish.  
319 Enrollment sites in three Harris county neighborhoods highly impacted by flooding were selected for  
320 recruitment: Addicks, Baytown, and East Houston. Baylor College of Medicine served as the fourth  
321 enrollment site. Written informed consent was obtained in English or Spanish by trained study personnel.  
322 Participants at 1-month post-Harvey were re-contacted for follow-up at 12-months post-Harvey; however,  
323 participation at 1-month post-Harvey was not a prerequisite for participation at 12-months post-Harvey.

324

### 325 **Exposures and Health Questionnaire**

326 All subjects completed a questionnaire detailing (1) subject demographics and addresses, (2) individual  
327 hurricane exposures and clean-up effort involvement, and (3) health outcomes including symptoms  
328 associated with mold exposure. Questionnaire data were coded using Research Electronic Data Capture  
329 (REDCap) software. After data cleaning, questionnaire data was imported into R (version 3.6.1) for  
330 integration with microbiome analyses. Hurricane exposures assessed at both time points included (1) if  
331 subjects' home flooded during Hurricane Harvey, (2) if there were new signs of mold growth in their home  
332 after Harvey, (3) if they were rescued during Harvey, and (4) if they were exposed to dirty water, sewage, or  
333 visible mold. At 1-month post-Harvey only, the questionnaire additionally asked if subjects were involved in  
334 clean-up efforts such as removing mud and debris. Health outcomes assessed included symptoms known  
335 to be associated with indoor dampness and/or mold exposure including throat irritation, sinus irritation, eye  
336 irritation, wheezing, cough, shortness of breath, and skin rash<sup>7,13</sup> (1-month and 12-months post-Harvey),  
337 and worsening asthma (only assessed at 1-month post-Harvey), collectively described as "allergic  
338 symptoms." For all symptoms except worsening asthma, subjects were asked to report symptoms that had  
339 occurred since Hurricane Harvey, excluding symptoms caused by a cold or seasonal allergies, and subjects  
340 provided a Yes/No response for each symptom. For worsening asthma, subjects were asked "Has your  
341 asthma gotten worse since Hurricane Harvey?" and subjects provided a Yes/No/Don't Know response. This  
342 question was not included in the 12-month post-Harvey questionnaire, and subjects who did not have

343 asthma were instructed to skip this question. Participants at both time points were also asked 1) if they had  
344 taken any antibiotics within the past month and/or the past 6 months, 2) if they had taken any probiotics  
345 within the past month and/or the past 6 months, and 3) if they are currently or have ever been vegan or  
346 vegetarian. For subjects who participated at both time points, answers to similar questions provided at 1-  
347 month versus 12-months post-Harvey were at times discrepant; attempts were made to re-contact  
348 participants to clarify answers when possible, otherwise data were unchanged.

349

### 350 **Neighborhood Assignment and Area-level Socioeconomic Disadvantage**

351 Subjects' addresses were geocoded using ArcGIS, and all subjects living within a 7.5 mile radius of the  
352 centroid of each study neighborhood were assigned to that neighborhood regardless of their enrollment site.  
353 Subjects whose homes were outside the 7.5 mile radius of all neighborhoods were assigned to "Other."  
354 Subject address was also used to assess census tract-level socioeconomic disadvantage by calculating an  
355 Area Deprivation Index (ADI) score for each address. Briefly, ADI uses 17 U.S. Census measures of  
356 income, housing, employment, and education to measure the level of deprivation within each census tract,  
357 with a higher ADI score indicative of greater socioeconomic disadvantage. ADI scores were calculated  
358 using the U.S. Census 2012-2016 American Community Survey (ACS) 5-year estimates data summarized  
359 to the census tract level. Singh's formula<sup>36,37</sup> was used to compute ADI scores for all census tracts in the  
360 state of Texas (n = 5,265). Houston3H Study participant addresses were then geocoded using ArcGIS, and  
361 participants were assigned an ADI Score based on the ADI score of the census tract they resided in. The  
362 median ADI score for the 1-month post-Harvey participants (106.23) was used to stratify all participants into  
363 low (ADI Score < 106.23) and high (ADI Score ≥ 106.23) ADI groups. Map of participant locations were  
364 created using the R package ggmap using address latitude and longitude geocoded in ArcGIS. For  
365 participants who had moved due to Hurricane Harvey, the address of their home at the time of Hurricane  
366 Harvey was used for neighborhood assignment and ADI score calculation.

367

### 368 **Sample Collection**

369 Four types of microbiome samples were collected from participants at both time points: nasal, saliva, stool,  
370 and swabs of subjects' homes. Nasal and saliva samples were collected upon enrollment and immediately  
371 placed on dry ice. For nasal samples, study personnel swabbed subjects' nares using the Catch-All Sample  
372 Collection Swab (Epicentre) for collection at 1-month post-Harvey and the BBL CultureSwab EZ (BD) at 12-  
373 months post-Harvey. Discontinuation of the Catch-All swab prevented the same instrument from being  
374 used at both time points. For saliva samples, subjects collected their own unstimulated saliva in a sterile  
375 Thermo Nunc 15mL conical tube (Thermo Fisher). At the time of enrollment, subjects were also provided  
376 an Omnigene Gut collection kit (DNA Genotek) as well as a swab for at-home collection of stool and a home  
377 environment sample, respectively. Due to shorthand of supplies at 1-month post-Harvey, non-sterile Q-tips  
378 were provided for house threshold swabs to prioritize sterile collection swabs for human microbiome  
379 sampling. At 12-months post-Harvey, a sterile double-tipped BBL Culture Swab (BD) was provided for door  
380 threshold sampling. Instructions for stool and home environment collection were given in person and  
381 provided in written English and Spanish. Participants were instructed to swab the entry/threshold of their  
382 front door. Stool and environmental samples were collected from participants one week after enrollment. A  
383 total of 625 samples were collected and processed for subsequent analysis at 1-month post-Harvey (107  
384 house swabs, 120 stool samples, 202 nasal swabs, 196 saliva samples) and 968 samples at 12-months  
385 post-Harvey (237 house swabs, 231 stool samples, 255 nasal swabs, and 245 saliva samples).

386

### 387 **Sample Extraction**

388 Microbial DNA was extracted from all sample types using the Qiagen MagAttract PowerSoil DNA Kit. DNA  
389 yielded from this extraction was subsequently used for all sequencing.

390

### 391 **16S rRNA Gene Sequencing**

392 All sample types were profiled by 16S-V4 sequencing. The 16S rRNA V4 region was amplified using 515F  
393 and 806R PCR primers containing single-index barcodes and Illumina adapters<sup>38</sup>. Samples were  
394 sequenced on the Illumina MiSeq platform using reagent kit v2 (2 × 250 bp) paired-end protocol. Reads

395 were demultiplexed using the Illumina ‘bcl2fastq’ software, then demultiplexed fastq read pairs were merged  
396 using USEARCH v7.0.1090<sup>39</sup> ‘fastq\_mergepairs’ function. Merging parameters required read pairs overlap  
397 by at least 50 base pairs, a merged length of at least 252 base pairs, a truncation quality above 5, and zero  
398 differences in the overlapping region. Merged reads with maximum expected error greater than 0.05 were  
399 filtered using usearch70 ‘fastq\_filter’ program, and PhiX was filtered using bowtie2 v.2.3.4.3<sup>40</sup> at the ‘very-  
400 sensitive’ parameter setting. Reads were run through usearch70 ‘derep\_fulllength’ program and sorted by  
401 size using usearch70 ‘sortbysize’ program. Operational Taxonomic Unit (OTU) clustering was performed  
402 using the UPARSE algorithm<sup>41</sup> with a 97% similarity cutoff value. A clustered OTU file with chimeras filtered  
403 was created using the usearch70 ‘uchime\_ref’ program and the GOLD database.<sup>42,43</sup> OTUs were mapped  
404 against an optimized version of SILVA Database<sup>44</sup> v132 containing only sequences from the V4 region of  
405 the 16S rRNA gene, using usearch70 ‘usearch\_global’ function with an identity threshold of 96.8%. All  
406 singleton and non-bacterial OTUs were filtered prior to analysis. After filtering, a total of 18,285,084 reads  
407 were retained (median 11,629 reads per sample).

#### 408 **ITS2 Gene Sequencing and Processing**

409 House, nasal, and stool samples were profiled by ITS2 sequencing. ITS3 and ITS4<sup>45</sup> primers containing  
410 adapters for MiSeq sequencing and 12mer molecular barcodes were used to amplify the ITS2 region.  
411 Samples were sequenced on the MiSeq platform (Illumina) using the 2x300 bp paired-end protocol<sup>38</sup>.  
412 USEARCH v7.0.1090<sup>39</sup> was used to demultiplex and merge paired reads. Mismatches were allowed for up  
413 to 5% of the overlapping sequence; the base with the higher Q score was chosen when there was a  
414 mismatch. Reads containing above 0.5% expected errors were discarded. The UPARSE algorithm<sup>41</sup> was  
415 used to iteratively cluster sequences into OTUs at a similarity cutoff value of 99%. USEARCH v8.0.1517  
416 and UCHIME were used to filter chimeras. To identify OTU taxonomy, USEARCH v8.0.1517 was used to  
417 map OTUs to the combined GenBank Plant (containing fungi) and Environmental databases. All non-fungal  
418 OTUs were filtered prior to analysis. After filtering, a total of 38,140,016 reads were retained (median  
419 33,848 reads per sample).

420



## 421 **Whole Genome Shotgun (WGS) Sequencing and Processing**

422 Stool samples were profiled by WGS sequencing. Metagenomic shotgun sequencing was performed on a  
423 NovaSeq 6000 (Illumina) yielding 150 bp paired-end reads. Bbduk3 (BBMap version 38.69) was used for  
424 quality trimming and adapter removal from raw fastq reads (trimming parameters: kmer length of 19, one  
425 mismatch allowed, and a min Phred quality score of 20). After trimming, reads with a minimum average  
426 quality score less than 17 and length shorter than 50 bp were removed. To identify PhiX (standard Illumina  
427 spike in) and human (host) reads, bbmap<sup>46</sup> (version 37.58) was used to map reads to a combined PhiX and  
428 hg38 reference database using a kmer length of 15, the bloom filter enabled, and fast search settings, and  
429 these reads were subsequently filtered using a custom in-house script. A total of 22,088,152,115 reads  
430 were retained after filtering (median 60,319,766 reads per sample, median coverage 9.05 Gbp). Taxonomic  
431 profiling was performed using MetaPhlan2,<sup>47</sup> and all non-bacterial taxa were filtered prior to analysis.  
432 Functional profiling of the gut microbiome was performed using HUMAnN2<sup>48</sup>, with minor modifications to the  
433 standard workflow: diamond<sup>49</sup> (version 0.9.26) was used for filtering and bbmap<sup>46</sup> was used as the  
434 nucleotide aligner. Uniref gene families were then mapped to KEGG Orthologs (KO's) using the utility  
435 mapping file provided by HUMAnN2 (map\_ko\_unriief90.txt.gz). KO's were then mapped to KEGG Pathways  
436 using the HUMAnN-v0.99<sup>50</sup> KEGG Pathway database (keggc). Unmapped, unintegrated, and ungrouped  
437 results were filtered, and outputs were then normalized to relative abundances for analysis. Butyrate  
438 producing-bacteria were determined by searching the UniProt database for bacterial species with an  
439 annotated or probable *buk* gene and by searching the literature<sup>51</sup> for experimentally-verified butyrate  
440 production by individual species. Where these results conflicted, experimentally validated butyrate  
441 production was used.

442

## 443 **Statistical Analysis**

444 All statistical analysis was performed in R (v3.6.1). Odds ratios and corresponding 95% confidence intervals  
445 and p-values were calculated using unconditional logistic regression adjusting for age, sex, race/ethnicity,  
446 and education level. Taxonomic analysis was performed using phyloseq (v1.30.0) and vegan (v2.5.6). For

447 all alpha and beta diversity analyses, rarefaction was performed to 5,000 reads (16S), 10,000 reads (ITS2 –  
448 nasal and house swabs), 1,000 reads (ITS2 – stool), and 2,982,616 estimated counts (WGS, minimum  
449 sample count). House microbiome samples submitted by subjects living in the same house were included in  
450 all analyses unless otherwise indicated. All beta diversity analyses used Binary Jaccard distances. For  
451 principal coordinate analyses, all samples lacking necessary metadata were removed before analysis, then  
452 ordination was performed on Binary Jaccard distance matrices for remaining samples. The adonis function  
453 (vegan) was used to calculate  $R^2$  and a p-values (PERMANOVA), and Bonferroni correction was used to  
454 correct for multiple hypothesis testing. PERMDISP was calculated using the betadisper function (vegan)  
455 using the group centroid. Alpha diversity was calculated based on the number of unique OTUs (ITS2) or  
456 number of unique bacterial species (WGS) detected after rarefaction. Linear Discriminant Analysis Effect  
457 Size (LEfSe, online galaxy version)<sup>15</sup> was used to evaluate bacterial species and pathways that were  
458 differentially abundant between subjects with and without allergic symptoms. For taxonomic analysis,  
459 relative abundance outputs of MetaPhlan2 were used as input for LEfSe analysis. For functional pathway  
460 analysis, all KEGG pathways with median non-zero coverage > 0.1 were used as input for LEfSe analysis.  
461 Co-occurrence analyses were performed with the package co-occur (v1.3) by converting species relative  
462 abundance to presence (relative abundance > 0%) or absence (relative abundance = 0%). The R package  
463 CuratedMetagenomicData<sup>52</sup> (v1.16.0) was used to import previously published<sup>33,53–55</sup> metagenomic data  
464 sets for co-occurrence analysis. All statistical tests are indicated in figure legends. Race/Ethnicity was  
465 treated as five separate categories (Non-Hispanic Black, Non-Hispanic White, Asian, Hispanic, and Other)  
466 for all analyses except for Supplementary Tables 1-3, where Asian was counted as “Other” to protect  
467 subject confidentiality. For figures that utilize boxplots, individual data points were plotted using the R  
468 function “geom\_jitter.”

469

## 470 **Data Availability**

471 16S-V4, ITS2, and WGS metagenomic data will be made available in a publicly accessible repository.  
472 Accompanying metadata will be made available, though some variables will be filtered and/or collapsed to  
473 maintain subject confidentiality.

474

#### 475 **Acknowledgements**

476 Funding for this study included the National Institute of Environmental Health Sciences (NIEHS) Mechanism  
477 for Time-Sensitive Research Opportunities in Environmental Health Sciences (R21ES029616 to MB and  
478 AO, R21ES029493 to JFP and CLW); BCM Dan L. Duncan Comprehensive Cancer Center, Vivian L. Smith  
479 Foundation, 5F30HD090891-03 to KMP, and P30ES030285 to CLW. We are grateful to L. D'Amico, A.N.  
480 Quach, and T. Auchtung who helped facilitate enrollment and sample collection.

481

#### 482 **Author Contributions**

483 JP, CW, AO, and MB conceived of the study, obtained IRB approval, and launched the study. CS, JS, GA,  
484 DNL, MB, KH and CW facilitated subject enrollment and/or sample collection. JS entered and cleaned  
485 questionnaire data. AO calculated neighborhood assignments and ADI scores. KH managed microbiome  
486 sample processing and sequencing. KP performed all analyses and wrote the manuscript. All authors edited  
487 and reviewed the manuscript.

488

#### 489 **Competing Interests**

490 The authors declare no competing financial interests.

491

#### 492 **Code Availability**

493 Analyses were performed using publicly available software.

494

#### 495 **Materials and Correspondence**

496 Correspondence should be addressed to Dr. Joseph Petrosino ([jpetrosi@bcm.edu](mailto:jpetrosi@bcm.edu)) and Dr. Cheryl Walker  
497 ([cheryl.walker@bcm.edu](mailto:cheryl.walker@bcm.edu)).  
498

## 499 **References**

- 500 1. Administration, N. O. and A. Costliest U.S. Tropical Cyclones.  
501 <https://www.ncdc.noaa.gov/billions/dcmi.pdf> (2020).
- 502 2. Morast, R. Hurricane Harvey by the numbers. *Houston Chronicle*  
503 <https://www.houstonchronicle.com/life/article/Hurricane-Harvey-by-the-numbers-12172287.php>  
504 (2017).
- 505 3. Hunn, D., Dempsey, M. & Zaveri, M. Harvey's floods. *Houston Chronicle*  
506 [https://www.houstonchronicle.com/news/article/In-Harvey-s-deluge-most-damaged-homes-were-](https://www.houstonchronicle.com/news/article/In-Harvey-s-deluge-most-damaged-homes-were-12794820.php)  
507 [12794820.php](https://www.houstonchronicle.com/news/article/In-Harvey-s-deluge-most-damaged-homes-were-12794820.php) (2018).
- 508 4. Hamblin, J. The Looming Consequences of Breathing Mold. *The Atlantic*  
509 <https://www.theatlantic.com/health/archive/2017/08/mold-city/538224/> (2017).
- 510 5. Bush, R. K., Portnoy, J. M., Saxon, A., Terr, A. I. & Wood, R. A. The medical effects of mold  
511 exposure. *J. Allergy Clin. Immunol.* **117**, 326–333 (2006).
- 512 6. Barbeau, D. N., Grimsley, L. F., White, L. E., El-Dahr, J. M. & Lichtveld, M. Mold Exposure and  
513 Health Effects Following Hurricanes Katrina and Rita. *Annu. Rev. Public Health* **31**, 165–178 (2010).
- 514 7. Mendell, M. J., Mirer, A. G., Cheung, K., Tong, M. & Douwes, J. Respiratory and allergic health  
515 effects of dampness, mold, and dampness-related agents: A review of the epidemiologic evidence.  
516 *Environ. Health Perspect.* **119**, 748–756 (2011).
- 517 8. Chow, N. A. *et al.* Hurricane-associated mold exposures among patients at risk for invasive mold  
518 infections after hurricane harvey — Houston, Texas, 2017. *Morb. Mortal. Wkly. Rep.* **68**, 470–473  
519 (2019).
- 520 9. Pascal, M. *et al.* Microbiome and allergic diseases. *Front. Immunol.* **9**, 1584 (2018).
- 521 10. Liu, H. *et al.* Butyrate: A double-edged sword for health? *Adv. Nutr.* **9**, 21–29 (2018).
- 522 11. Theiler, A. *et al.* Butyrate ameliorates allergic airway inflammation by limiting eosinophil trafficking  
523 and survival. *J. Allergy Clin. Immunol.* **144**, 764–776 (2019).
- 524 12. Oluyomi, A. O. *et al.* Houston hurricane Harvey health (Houston-3H) study: assessment of allergic

- 525 symptoms and stress after hurricane Harvey flooding. *Environ. Heal. A Glob. Access Sci. Source* **20**,  
526 1–15 (2021).
- 527 13. Mold. <https://www.cdc.gov/mold/> (2019).
- 528 14. Fujimura, K. E. & Lynch, S. V. Microbiota in allergy and asthma and the emerging relationship with  
529 the gut microbiome. *Cell Host Microbe* **17**, 592–602 (2015).
- 530 15. Segata, N. *et al.* Metagenomic biomarker discovery and explanation. *Genome Biol.* **12**, R60 (2011).
- 531 16. Corrêa-Oliveira, R., Fachi, J. L., Vieira, A., Sato, F. T. & Vinolo, M. A. R. Regulation of immune cell  
532 function by short-chain fatty acids. *Clin. Transl. Immunol.* **5**, 1–8 (2016).
- 533 17. Turnbaugh, P. J. *et al.* An obesity-associated gut microbiome with increased capacity for energy  
534 harvest. *Nature* **444**, 1027–1031 (2006).
- 535 18. Francino, M. P. Antibiotics and the human gut microbiome: Dysbioses and accumulation of  
536 resistances. *Front. Microbiol.* **6**, 1–11 (2016).
- 537 19. Nylund, L. *et al.* Severity of atopic disease inversely correlates with intestinal microbiota diversity and  
538 butyrate-producing bacteria. *Allergy Eur. J. Allergy Clin. Immunol.* **70**, 241–244 (2015).
- 539 20. Roudit, C. *et al.* High levels of butyrate and propionate in early life are associated with protection  
540 against atopy. *Allergy Eur. J. Allergy Clin. Immunol.* **74**, 799–809 (2019).
- 541 21. Cait, A. *et al.* Reduced genetic potential for butyrate fermentation in the gut microbiome of infants  
542 who develop allergic sensitization. *J. Allergy Clin. Immunol.* **144**, 1638-1647.e3 (2019).
- 543 22. Wang, Q. *et al.* A metagenome-wide association study of gut microbiota in asthma in UK adults. *BMC*  
544 *Microbiol.* **18**, 1–7 (2018).
- 545 23. Trompette, A. *et al.* Gut microbiota metabolism of dietary fiber influences allergic airway disease and  
546 hematopoiesis. *Nat. Med.* **20**, 159–166 (2014).
- 547 24. Vieira, R. de S. *et al.* Butyrate Attenuates Lung Inflammation by Negatively Modulating Th9 Cells.  
548 *Front. Immunol.* **10**, 67 (2019).
- 549 25. Halnes, I. *et al.* Soluble fibre meal challenge reduces airway inflammation and expression of GPR43  
550 and GPR41 in asthma. *Nutrients* **9**, (2017).

- 551 26. McLoughlin, R. *et al.* Soluble fibre supplementation with and without a probiotic in adults with asthma:  
552 A 7-day randomised, double blind, three way cross-over trial. *EBioMedicine* **46**, 473–485 (2019).
- 553 27. Bacher, P. *et al.* Human Anti-fungal Th17 Immunity and Pathology Rely on Cross-Reactivity against  
554 *Candida albicans*. *Cell* **176**, 1–16 (2019).
- 555 28. García, C. *et al.* The Human Gut Microbial Metabolome Modulates Fungal Growth via the TOR  
556 Signaling Pathway. *mSphere* **2**, 1–15 (2017).
- 557 29. Crost, E. H. *et al.* The mucin-degradation strategy of *Ruminococcus gnavus*: The importance of  
558 intramolecular trans-sialidases. *Gut Microbes* **7**, 302–312 (2016).
- 559 30. Chua, H. H. *et al.* Intestinal Dysbiosis Featuring Abundance of *Ruminococcus gnavus* Associates  
560 With Allergic Diseases in Infants. *Gastroenterology* **154**, 154–167 (2018).
- 561 31. Tomova, A. *et al.* The effects of vegetarian and vegan diets on gut microbiota. *Front. Nutr.* **6**, (2019).
- 562 32. Desai, M. S. *et al.* A Dietary Fiber-Deprived Gut Microbiota Degrades the Colonic Mucus Barrier and  
563 Enhances Pathogen Susceptibility. *Cell* **167**, 1339-1353.e21 (2016).
- 564 33. Huttenhower, C. *et al.* Structure, function and diversity of the healthy human microbiome. *Nature* **486**,  
565 207–214 (2012).
- 566 34. Nash, A. K. *et al.* The gut mycobiome of the Human Microbiome Project healthy cohort. *Microbiome*  
567 **5**, 153 (2017).
- 568 35. Ursula, B. S., Verena, D., Raphaela, P. & Breitenbach, M. The Spectrum of Fungal Allergy. 58–86  
569 (2008). doi:10.1159/000107578
- 570 36. Knighton, A. J., Savitz, L., Belnap, T., Stephenson, B. & VanDerslice, J. Introduction of an Area  
571 Deprivation Index Measuring Patient Socio-economic Status in an Integrated Health System:  
572 Implications for Population Health. *eGEMs (Generating Evid. Methods to Improv. patient outcomes)*  
573 **4**, 9 (2016).
- 574 37. Singh, G. K. Area Deprivation and Widening Inequalities in US Mortality, 1969-1998. *Am. J. Public*  
575 *Health* **93**, 1137–1143 (2003).
- 576 38. Caporaso, J. G. *et al.* Ultra-high-throughput microbial community analysis on the Illumina HiSeq and

- 577 MiSeq platforms. *ISME J.* **6**, 1621–1624 (2012).
- 578 39. Edgar, R. C. Search and clustering orders of magnitude faster than BLAST. *Bioinformatics* **26**, 2460–  
579 2461 (2010).
- 580 40. Langmead, B. & Salzberg, S. L. Fast gapped-read alignment with Bowtie 2. *Nat. Methods* **9**, 357–359  
581 (2012).
- 582 41. Edgar, R. C. UPARSE: Highly accurate OTU sequences from microbial amplicon reads. *Nat.*  
583 *Methods* **10**, 996–998 (2013).
- 584 42. Kyrpides, N. C. Genomes OnLine Database (GOLD 1.0): a monitor of complete and ongoing genome  
585 projects world-wide. *Bioinformatics* **15**, 773–774 (1999).
- 586 43. Mukherjee, S. *et al.* Genomes OnLine database (GOLD) v.7: Updates and new features. *Nucleic*  
587 *Acids Res.* **47**, D649–D659 (2019).
- 588 44. Quast, C. *et al.* The SILVA ribosomal RNA gene database project: Improved data processing and  
589 web-based tools. *Nucleic Acids Res.* **41**, 590–596 (2013).
- 590 45. White, T., Bruns, T., Lee, S. & Taylor, J. *Amplification and direct sequencing of fungal ribosomal RNA*  
591 *genes for phylogenetics. In PCR Protocols: A Guide to Methods and Applications.* (1990).
- 592 46. Bushnell, B. BBMap. [sourceforge.net/projects/bbmap/](https://sourceforge.net/projects/bbmap/)
- 593 47. Segata, N. *et al.* Metagenomic microbial community profiling using unique clade-specific marker  
594 genes. *Nat. Methods* **9**, 811–814 (2012).
- 595 48. Franzosa, E. A. *et al.* Species-level functional profiling of metagenomes and metatranscriptomes.  
596 *Nat. Methods* **15**, 962–968 (2018).
- 597 49. Buchfink, B., Xie, C. & Huson, D. H. Fast and sensitive protein alignment using DIAMOND. *Nat.*  
598 *Methods* **12**, 59–60 (2014).
- 599 50. Abubucker, S. *et al.* Metabolic reconstruction for metagenomic data and its application to the human  
600 microbiome. *PLoS Comput. Biol.* **8**, e1002358 (2012).
- 601 51. Louis, P. & Flint, H. J. Formation of propionate and butyrate by the human colonic microbiota.  
602 *Environ. Microbiol.* **19**, 29–41 (2017).



- 603 52. Pasolli, E. *et al.* Accessible, curated metagenomic data through ExperimentHub. *Nat. Methods* **14**,  
604 1023–1024 (2017).
- 605 53. Schirmer, M. *et al.* Linking the Human Gut Microbiome to Inflammatory Cytokine Production  
606 Capacity. *Cell* **167**, 1125-1136.e8 (2016).
- 607 54. Le Chatelier, E. *et al.* Richness of human gut microbiome correlates with metabolic markers. *Nature*  
608 **500**, 541–6 (2013).
- 609 55. Dhakan, D. B. *et al.* The unique composition of Indian gut microbiome, gene catalogue, and  
610 associated fecal metabolome deciphered using multi-omics approaches. *Gigascience* **8**, 1–20 (2019).  
611  
612

613

**a. Distribution of Houston3H Study Participants across Harris Co.**

614

615

616

617

618

619

620

621

622

623

624

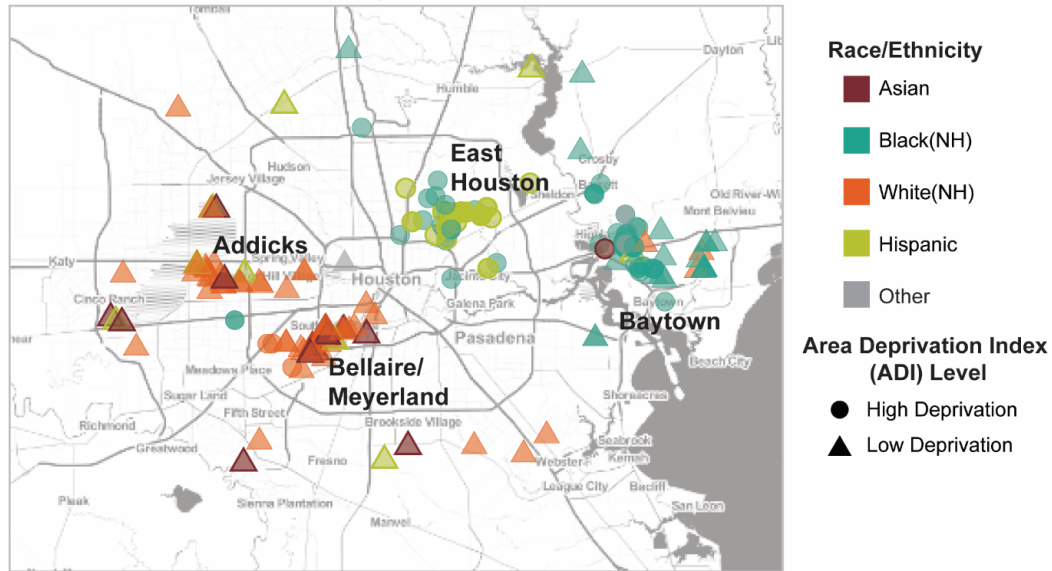

625

**b. Variation in microbiome composition by location and subject demographics**

**Bacteria (16S) 1-month post-Harvey**

626

627

628

629

630

631

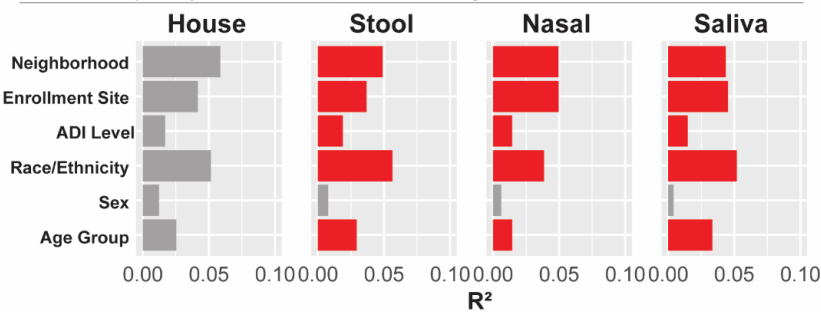

632

**Fungi (ITS2) 1-month post-Harvey**

633

634

635

636

637

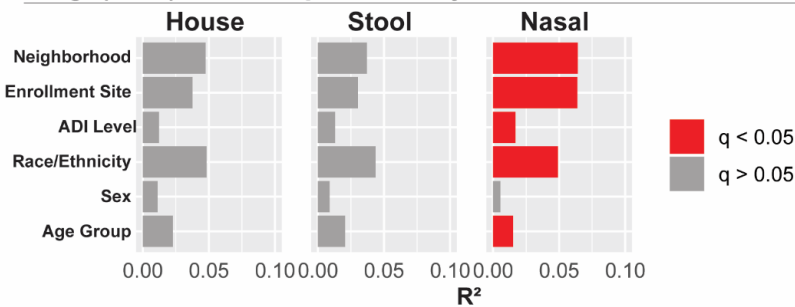

638

**Figure 1. Impact of subject demographics on bacterial and fungal microbiome composition.** **a.** Distribution of study participants (1-month post-Harvey) across Houston-area neighborhoods. Color indicates race/ethnicity of subjects, shape indicates census tract-level calculation of area deprivation index (ADI) of subjects' homes, with higher ADI scores indicative of lower socioeconomic status. Placement of markers on map represent approximate location of participants' homes at the time of Hurricane Harvey. **b.** Principal coordinate analysis (PCoA) of Binary Jaccard distances was used to evaluate associations between demographic variables and microbiome composition at 1-month post-Harvey. PERMANOVA was used to calculate  $R^2$  (percent of total microbial variation accounted for by each variable) and p-values. Bonferroni correction of p-values was used to calculate q-values for each body site. Total samples (n) remaining in each analysis after rarefaction: house 16S (n=80), nasal 16S (n=186), stool 16S (n=120), saliva 16S (n=194), house ITS2 (n=93), nasal ITS2 (n=189), stool ITS2 (n=102). Only one house swab per household was included in house microbiome analyses. Sample numbers and statistics for each individual analysis are provided in Supplementary Table 4.

650  
651  
652  
653  
654  
655  
656  
657  
658  
659  
660

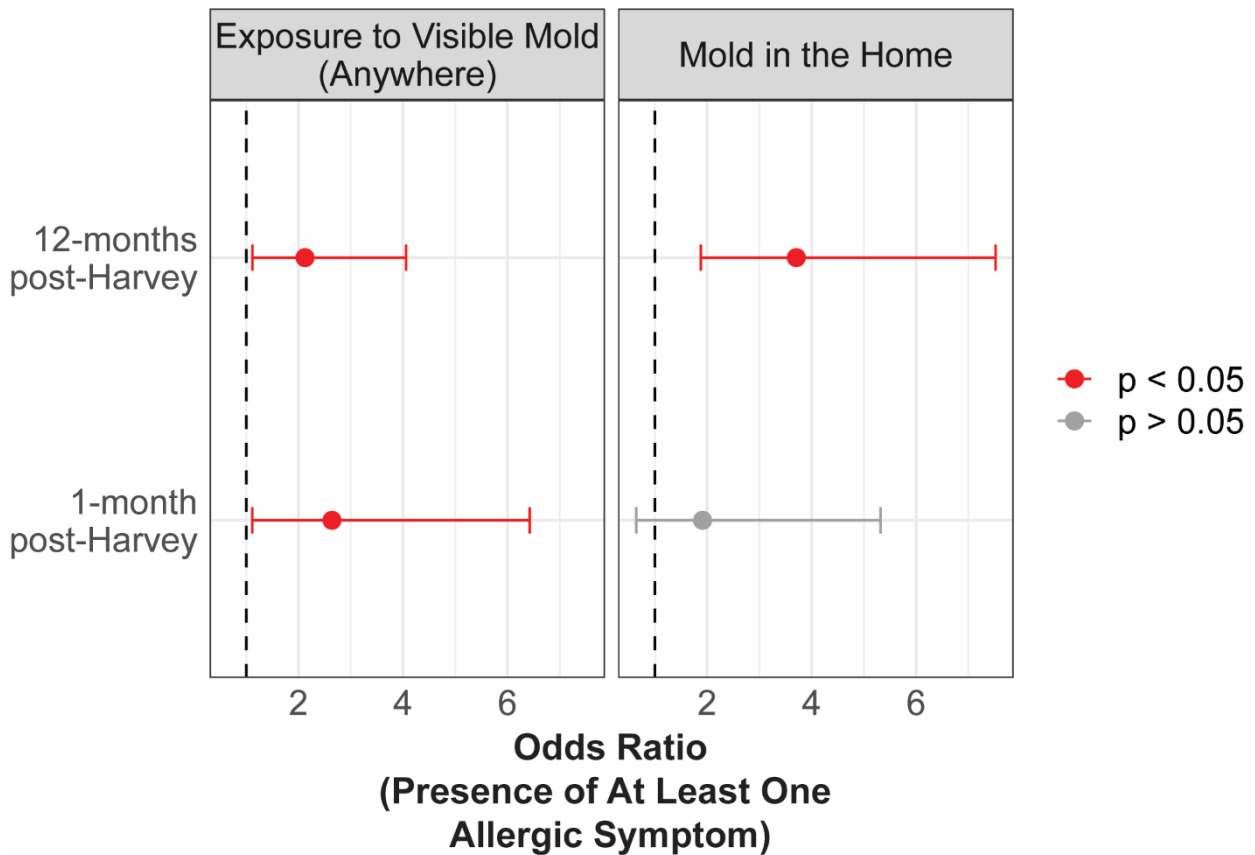

661 **Figure 2. Association between reported exposure to mold and presence of allergic symptoms.** Odds ratios  
662 calculated using reported exposures to mold (visible mold anywhere, or mold in the home) and presence of at least one  
663 allergic symptom at each time point, controlling for race/ethnicity, age, sex, and education level. Circles indicate odds  
664 ratios and bars indicate 95% confidence intervals. Total subjects in each analysis, excluding missing values: exposure  
665 to visible mold, 1-month post-Harvey (n = 168), exposure to visible mold, 12-months post-Harvey (n = 243), mold in the  
666 home, 1-month post-Harvey (n = 151), mold in the home, 12-months post-Harvey (n = 207).

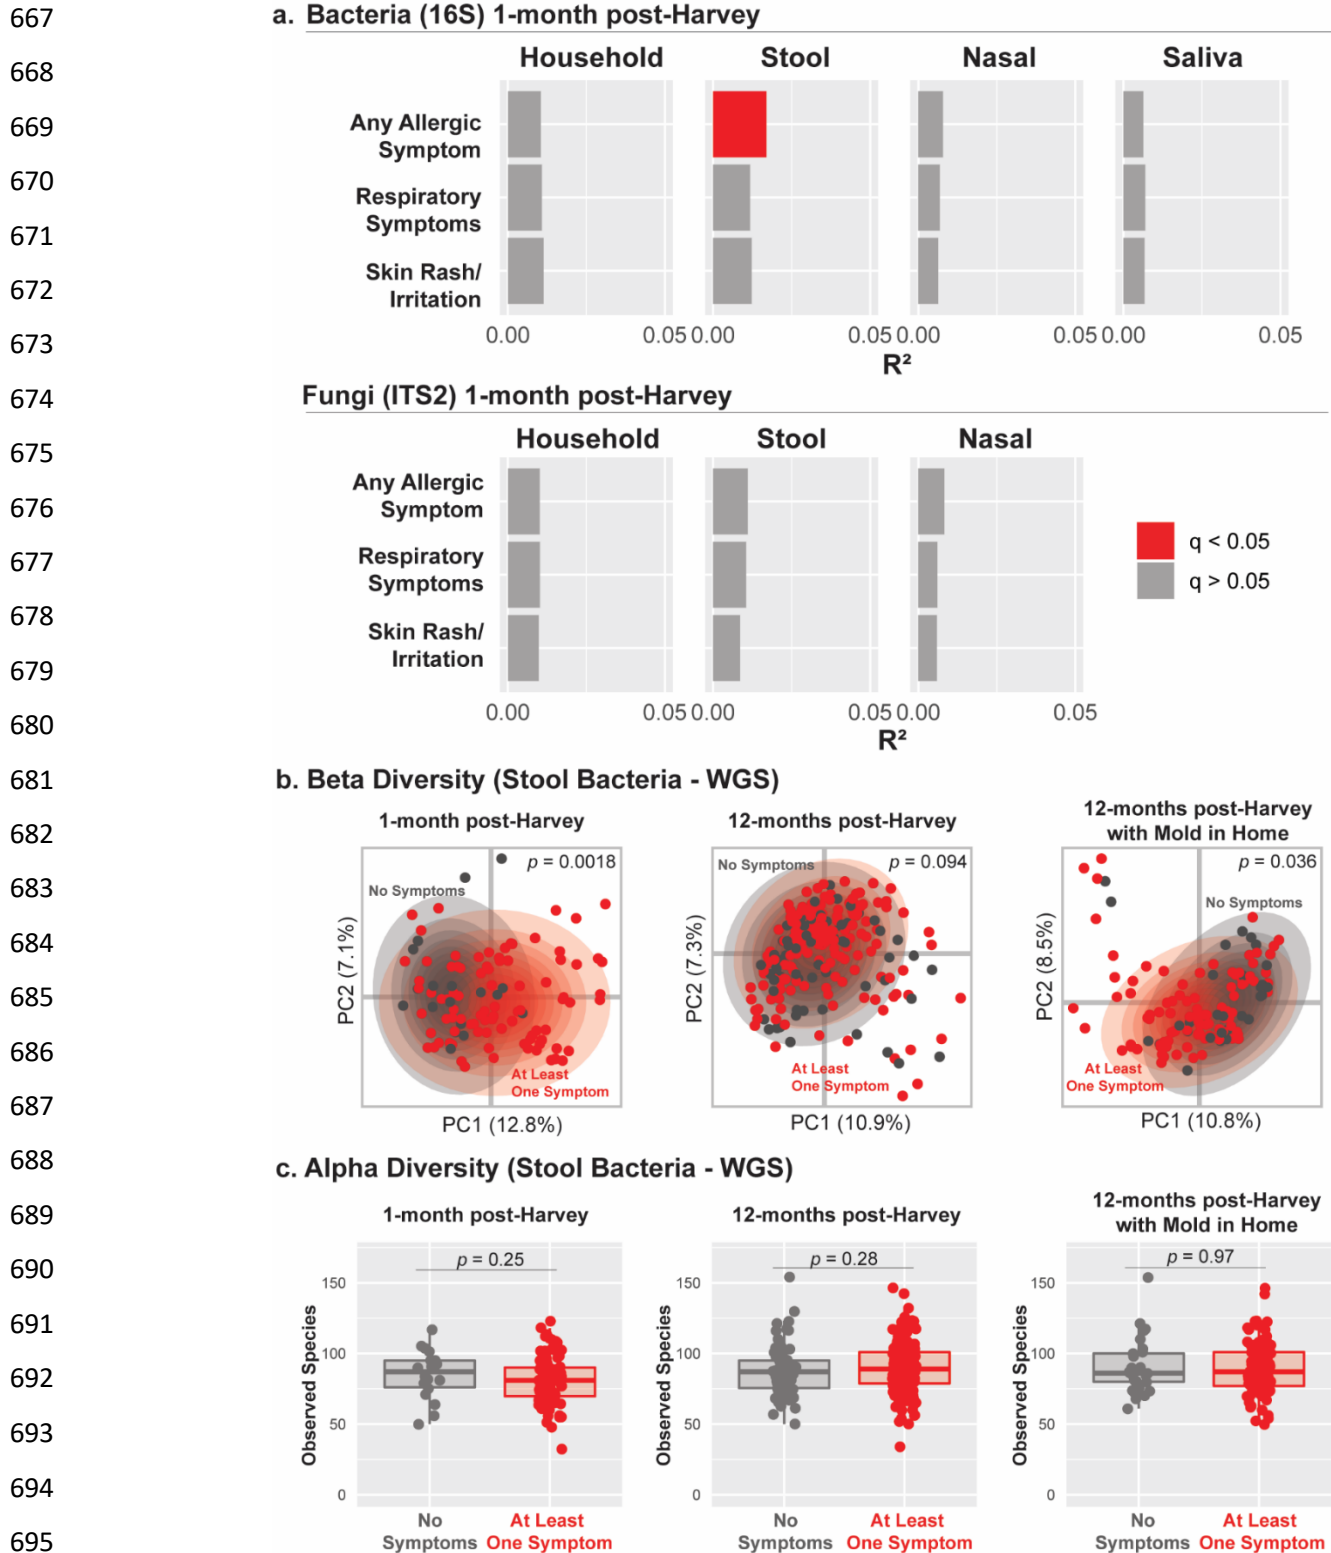

696 **Figure 3. Association between microbiome composition and allergic health outcomes.** a. PCoA analyses of Binary  
 697 Jaccard distances were used to evaluate associations between bacterial (16S) and fungal (ITS2) microbiota composition  
 698 and reported allergic symptoms within 1-month post-Harvey. PERMANOVA was used to calculate  $R^2$  (percent of total  
 699 microbial variation accounted for by each variable) and p-values, followed by Bonferroni correction. Total samples in  
 700 each analysis after rarefaction: house 16S (n=77), stool 16S (n=107), nasal 16S (n=161), saliva 16S (n=165), house  
 701 ITS2 (n=92), stool ITS2 (n=89), nasal ITS2 (n=162). Sample numbers and statistics for each individual analysis are

702 provided in Supplementary Table 4. **b.** PCoA analysis of bacterial species profiled by Whole Genome Shotgun (WGS)  
703 sequencing of stool samples evaluating association between gut bacterial species and allergic symptoms at 1-month  
704 post-Harvey (n=18 without symptoms, n=88 with symptoms, PERMANOVA  $p = 0.0018$  and  $R^2 = 0.021$ , PERMDISP  $p <$   
705  $0.001$ ) and 12-months post-Harvey (n=67 without symptoms, n = 156 with symptoms, PERMANOVA  $p = 0.094$  and  $R^2$   
706 =  $0.006$ , PERMDISP  $p = 0.52$ ) in all subjects, and sub-analysis of 12-months post-Harvey subjects with reported signs  
707 of mold in the home (n=29 without symptoms, n=97 with symptoms, PERMANOVA  $p = 0.036$  and  $R^2 = 0.012$ , PERMDISP  
708  $p = 0.20$ ). Outer ellipse represents 95% normal confidence ellipse for each group. **c.** No difference in gut bacterial alpha  
709 diversity was detected at any time point (two-sided Mann-Whitney test;  $p > 0.05$ ). Box plots indicate median and  
710 interquartile range (IQR), whiskers show smallest (lower whisker) or largest (upper whisker) value within 1.5 times the  
711 IQR.

712

It is made available under a [CC-BY-NC-ND 4.0 International license](https://creativecommons.org/licenses/by-nc-nd/4.0/).

713

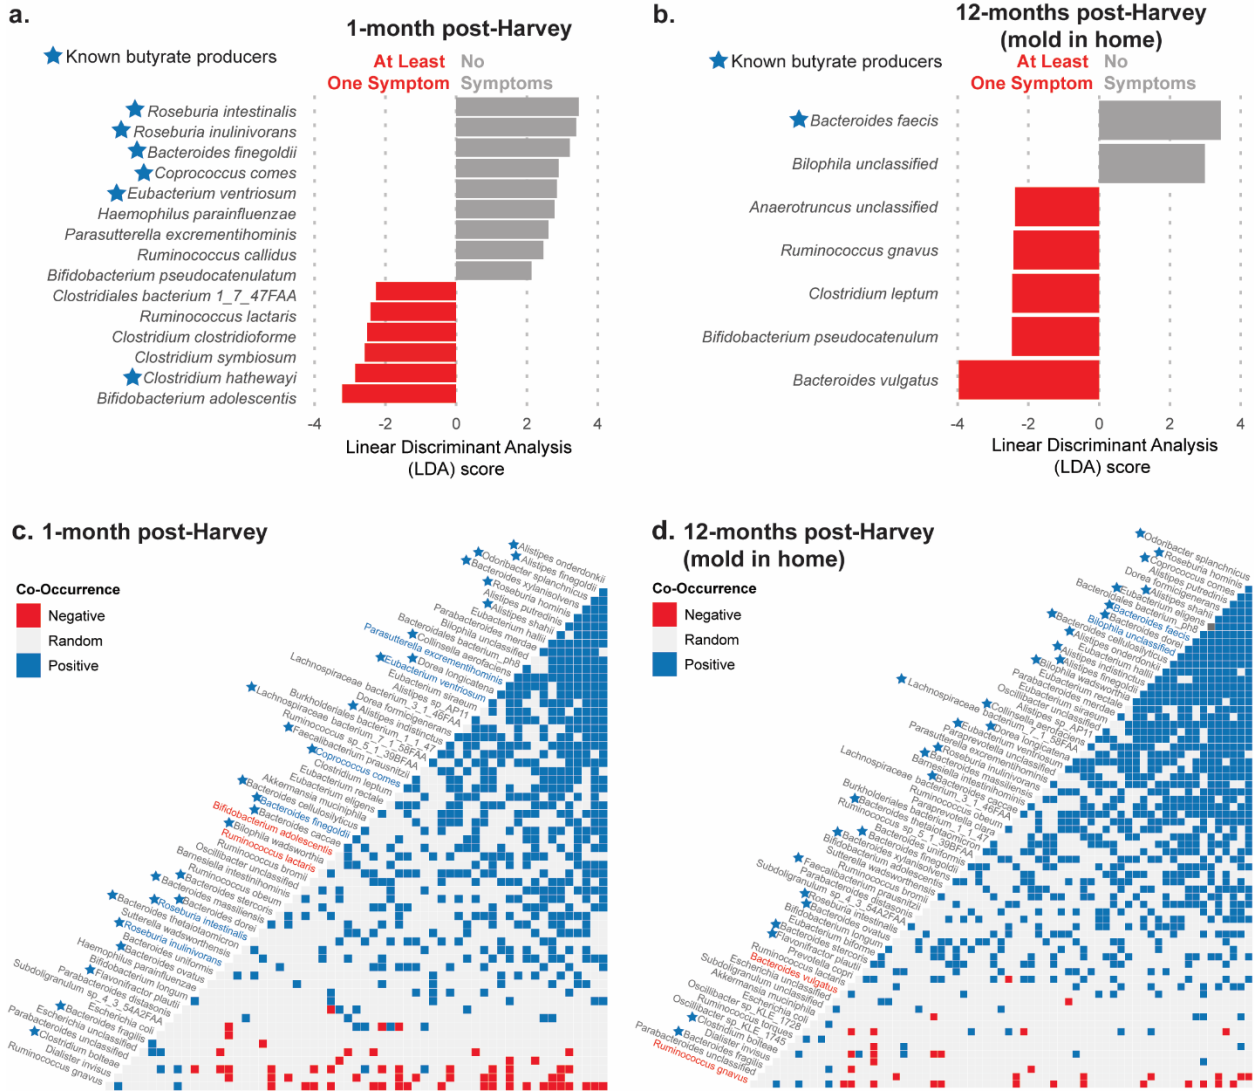

714 **Figure 4. Gut bacterial species co-occurrence and association with allergic health outcomes.** Linear discriminant  
 715 analysis Effect Size (LEfSe) reveals bacterial species associated with absence of allergic symptoms (gray) and presence  
 716 of allergic symptoms (red) at 1-month post-Harvey (**a**, n=18 without symptoms, n=88 with symptoms) and 12-months  
 717 post-Harvey for subjects with signs of mold in the home (**b**, n=29 without symptoms, n=97 with symptoms) (Kruskal-  
 718 Wallis  $p < 0.05$ , LDA Score  $> 2.0$ , species prevalence  $> 20\%$  of samples). Co-occurrence analysis of all bacterial species  
 719 reveals positive (blue) and negative (red) associations between gut bacterial species in subjects at 1-month post-Harvey  
 720 (**c**, n=117) and 12-months post-Harvey with mold in home (**d**, n=130). Species associated with presence and absence  
 721 of allergic symptoms are highlighted in red and blue, respectively, and blue stars indicate butyrate-producing bacteria.  
 722 Co-occurrence analyses include species present at  $>0.1\%$  relative abundance in at least 20% of samples.

723

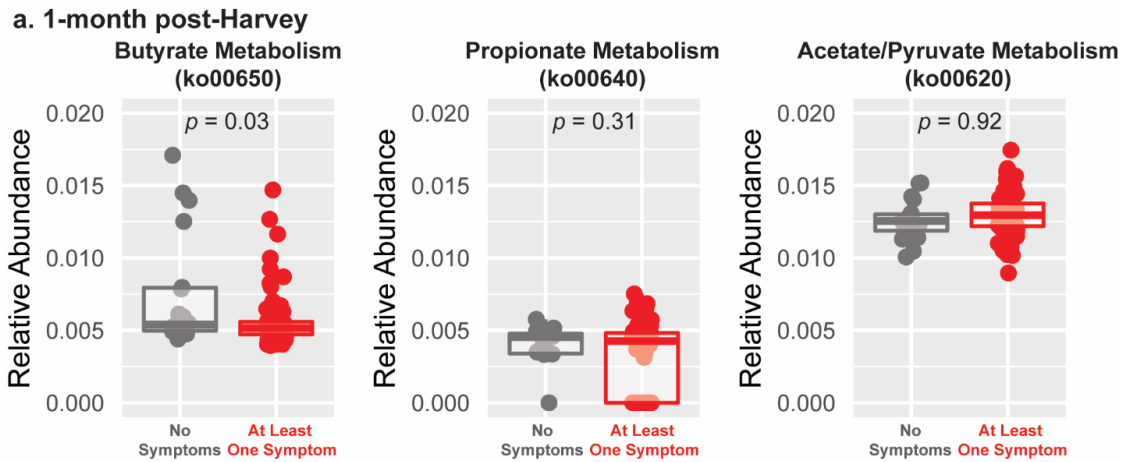

732

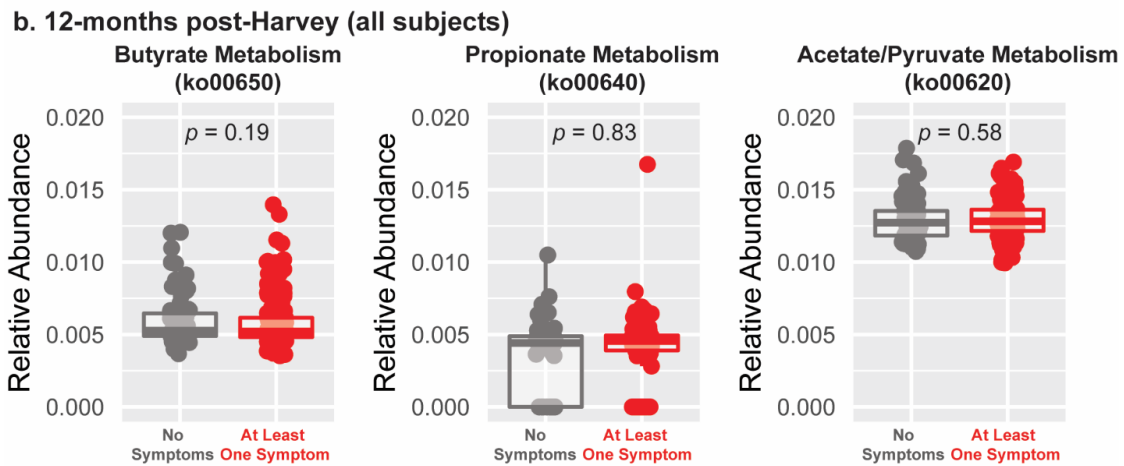

741

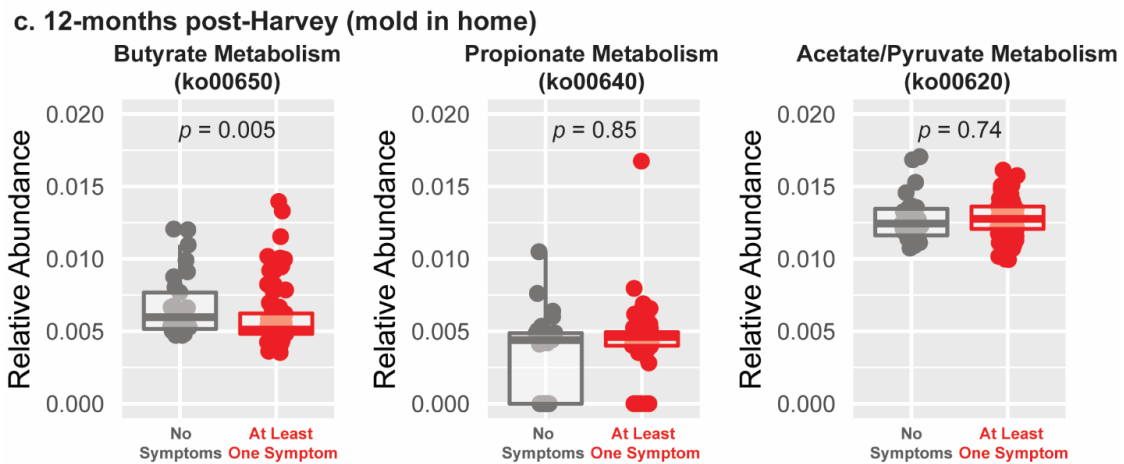

750

751

752

753

754

755

756

757

**Figure 5. Relative abundance of bacterial genes involved in short-chain fatty acid (SCFA) metabolism in association with allergic symptoms.** WGS sequencing was used to determine the relative abundance of metabolic pathways involved in the production of the three major SCFAs (butyrate, propionate, and acetate) at 1-month post-Harvey (**a**, n=18 without symptoms, n=88 with symptoms), 12-months post-Harvey (all subjects) (**b**, n=67 without symptoms, n=156 with symptoms) and 12-months post-Harvey (mold in home only) (**c**, n=29 without symptoms, n=97 with symptoms). All statistical tests reported are one-sided Mann-Whitney tests. Box plots indicate median and interquartile range (IQR), whiskers show smallest (lower whisker) or largest (upper whisker) value within 1.5 times the IQR.
